# Supplementary material for: Biological properties of active compounds from Ageratina adenophora
Source: PubMed Central journal article supplement — SAGE Open Med. 2023 May 15;11:20503121231167964. doi: 10.1177/20503121231167964 (PMC10186572; doi:10.1177/20503121231167964), 2023-05-15

# SAGE AUTHORSHIP CHANGE REQUEST

## INSTRUCTIONS

Please complete all sections of this form. We require that **all** authors (including current co-authors, those to be added and those to be removed) sign the relevant sections below. We require all signatures on the same copy of the form. Once complete, please upload the form with your revised submission or email it back to the sender.

## SECTION ONE: PAPER INFORMATION

JOURNAL NAME: SAGE Open Medicine

PAPER TITLE: Biological properties of active compounds from Ageratina adenophora

MANUSCRIPT ID NUMBER: SOM-23-0043. R2

## SECTION TWO: ESSENTIAL CONDITIONS FOR CHANGE

The new author list should contain **only those who can legitimately claim authorship**, as per the Journal's manuscript submission guidelines. All contributors who do not meet the criteria for authorship should instead be listed in an 'Acknowledgements' section.

## SECTION THREE: REASON FOR AUTHORSHIP CHANGE

Please provide a detailed explanation for the change in authors in the box below.

Zhao Chenchen corrected the writing content and revised grammar of the manuscript in detail, and added the form. Therefore, with the consent of Wei Sun and Shanshan Liu, she was added as a co-author.

## SECTION FOUR: CONTRIBUTIONS OF ADDED AUTHORS

For author(s) to be added, please provide a detailed list of each author's contributions in the box below.

The manuscript was written by the contribution of Wei Sun and Shanshan Liu, Chenchen ZHAO corrected the writing content and revised grammar of the manuscript.

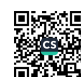

SECTION FIVE: AUTHOR DECLARATIONS

We agree to the proposed change of authorship to the above paper. NB: all authors (added and removed) must sign below, and cannot sign on behalf of another author (doing so may result in rejection of the manuscript).

**DECLARATION: All the below listed authors agree that they can claim authorship to the submitted paper as they meet the criteria as per SECTION TWO.**

List of existing and proposed new authors to sign. Please sign, indicating your agreement to the proposed change and order. The individuals listed below will each be credited as authors in the published paper. (Please ask if additional rows are required.)

| AUTHOR NAME   | AUTHOR SIGNATURE | DATE          |
|---------------|------------------|---------------|
| Wei Sun       | Wei Sun          | Mar. 16, 2023 |
| Shanshan Liu  | Shanshan Liu     | Mar. 16, 2023 |
| Chenchen Zhao | chenchen zhao    | Mar. 16, 2023 |
|               |                  |               |
|               |                  |               |
|               |                  |               |
|               |                  |               |
|               |                  |               |
|               |                  |               |
|               |                  |               |
|               |                  |               |
|               |                  |               |
|               |                  |               |
|               |                  |               |
|               |                  |               |
|               |                  |               |
|               |                  |               |
|               |                  |               |
|               |                  |               |
|               |                  |               |

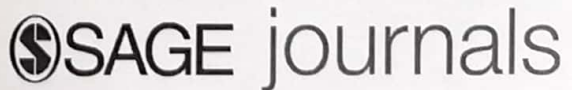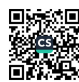

**DECLARATION:** All the below listed authors agree that they cannot claim authorship to the submitted paper as they do not (or no longer) meet the criteria as per SECTION TWO.

List of removed authors. Please sign, indicating your agreement to be removed from the list of registered authors. The individuals listed below will not be credited as authors in the published paper. (Please ask if additional rows are required.)

| AUTHOR NAME | AUTHOR SIGNATURE | DATE |
|-------------|------------------|------|
|             |                  |      |
|             |                  |      |
|             |                  |      |
|             |                  |      |
|             |                  |      |
|             |                  |      |
|             |                  |      |
|             |                  |      |
|             |                  |      |
|             |                  |      |
|             |                  |      |
|             |                  |      |
|             |                  |      |
|             |                  |      |
|             |                  |      |
|             |                  |      |
|             |                  |      |
|             |                  |      |
|             |                  |      |
|             |                  |      |
|             |                  |      |

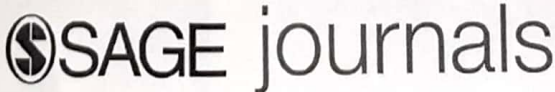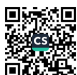

Supplement: sj-pdf-1-smo-10.1177_20503121231167964.pdf [file sj-pdf-1-smo-10.1177_20503121231167964.pdf]
